# Supplementary material
Source: PubMed Central journal article supplement (PMC2850174)

**BIOSYNTHESIS OF TRUNCATED N-LINKED OLIGOSACCHARIDES RESULTS  
FROM NON-ORTHOLOGOUS HEXOSAMINIDASE-MEDIATED MECHANISMS  
IN NEMATODES, PLANTS AND INSECTS**

Martin Gutternigg<sup>‡</sup>, Dorothea Kretschmer-Lubich<sup>‡</sup>, Katharina Paschinger<sup>‡</sup>, Dubravko Rendić<sup>‡</sup>, Josef Hader<sup>‡</sup>, Petra Geier<sup>‡</sup>, Ramona Ranftl<sup>‡</sup>, Verena Jantsch<sup>§</sup>, Günter Lochnit<sup>¶</sup>, and Iain B. H. Wilson<sup>‡</sup>

<sup>‡</sup> Department für Chemie, Universität für Bodenkultur, Muthgasse 18, A-1190 Wien, Austria

<sup>§</sup> Abteilung für Chromosomenbiologie, Vienna Biocenter II, A-1030 Wien, Austria

<sup>¶</sup> Institut für Biochemie, Justus-Liebig-Universität, D-35292 Gießen, Germany

**Supplementary Data**

Two figures (Supplementary Figures 1 and 2) are included in this supplement.

**Supplementary Figure 1: Alignment of four novel hexosaminidases from *Caenorhabditis elegans*.** The putative protein sequences of HEX-2, HEX-3, HEX-4 and HEX-5 are presented with residues identical between two or more sequence highlighted in grey. The HIGADEA sequences are in bold (see also Figure 1); the putative transmembrane sequences are in italics, potential N-glycosylation sites are double-underlined and residue numbers are given at the end of each line.

```

HEX-2  MFPMRCIRRRSIDFVLKGVILTTICLFLFHMTSSYPKGGISQRALDSMQKEPQTPVLVQK 60
HEX-3  MLR-GFFGRRRSAWVRLIYLCIVTIIIFLFATSQFKSTTTTHARFVPEPSDPRLHPNSPLQ 59

HEX-2  RENFEESIDVAVEQESKKENPFVNQOASTENAKPITQEVKIERPSRDNEFYKNVVIHFDL 120
HEX-3  APKAQEPAAAETTKKPSRQPHHTTAKPRTEN-VEINGEKYPKLSPDGNLIPQRRIVHLDL 118
HEX-4  MHKMSKLCFLALLSVTFMLIFVLTTPYSNDRSSYAAAYEGGIDPRKTRQFKNIIVHLDL 58
HEX-5  MCNIFQIVVWPKMLLRRTICILACIVQFATCGYQRSIVHFDL 41

HEX-2  KGAPPKVDYFLDLLRLIAKGGATGILLEWEDMFPWTGKLEQFKNTDAYSESDVDMILSEA 180
HEX-3  KGAPYKPEFFTELFFAFFNRIQATGILLEWEDMFPFKGRIRGAINKNAYSMTVEHILQEA 178
HEX-4  KGAPPRVEYLIEFFKLLSKHVDGILIEYEDMFPYSGDIEEIRRDLYSENDIRRIIQAA 118
HEX-5  KGAPPKVAYFKQLLTTISGLGATGVLEWEDMFPYQGGLSRVVKNAYTEEEVISVLEHA 101

HEX-2  TKLKLVDIPLVQTFGHLEWILKYEEMRKYRENDAYPQVLCLGNEEGVEFVREMIRQVAKK 240
HEX-3  HQKHLQIIPLVQTMGHLEWILKLEEFAHLREDTRFPQVICFSDENAWELIKEMIEEVANV 238
HEX-4  EVHNLEVIPLIQSFGHLEFVLKSKFMGLSEDLIDLNTICISDSKSIDIVKQMIEQIRRL 178
HEX-5  QQLQLEVIPLVQTLAHMEWILKTEEYSVLREDERYPMVACIGNPESLDIILDSVNQLMRI 161

HEX-2  HAKYGIPFFHIGADEAFEFVGCQESLDWIKKNGKNGRKQLLALAHLKAIAEFAKQQTGDS 300
HEX-3  HKKYGMSYFHIGADEAFQIGICNAS-ITQIKKEFTRERLMLW-HIARTAR-FVKEKYPET 295
HEX-4  HP--NSTRIHIGADEAYHVAEDQRCIERM-EKESIGKSDLKLEHIAKIGK-FARENAGFE 234
HEX-5  HSNFNTGYVHIGADEAFQVGCDADREILPVKYDNNKLRMIFDHLRMVSL-NITEEYPST 220

HEX-2  TQILAWHDMLKDFDSRLIKNLELGQIIQPVVWDYSENIITLND--YIFSA-LAENFPTMW 357
HEX-3  -QVLAWHDMLASAMESDIEDYKLTELLQPVLWNYAEDLDIYLP--RSTWMLR-NFRNVW 351
HEX-4  -TVFANDMDFKESEETIRKSKINKFIVPVVWGYRTDVTENGYFPDGLFERIFNVDFRFY 293
HEX-5  -KVLMWYDELKSAPLELIKEYNLDNLVIPPVWVYTANLNDLP--SEMWKNMSYSFKEVW 277

HEX-2  ASSAYKGANYPASASTSEVRHYETNNRNWIRTKQQERKFKNGFQGIIVTGWQRYDHLAGL 417
HEX-3  GSSAWKGADGPARYSTNANHLYLKNHESWIKQFTMVY-KDFEVVEGLIMAGWSRYDHFAVL 410
HEX-4  VASAFKGADGARQQFSNISRYLENQKSYVNLMDLHKNAAQKVDGIFVTGWSRFNHFNAL 353
HEX-5  GGSAFKGADGASRYWNRKPYILNNKEWYLQNEKYK-PQFTTFDSIIITGWQRYDHFFASL 336

HEX-2  CETLPIGTASMMLQMQIALNAPALDLEGTRQKAATLLECQ----GFNVDGVKVVSNQCK 472
HEX-3  AETIPVALPTLAMSMETMIE--GRPLAGNYPVTSELLQCTPPLDLGFTAT-----GCK 461
HEX-4  CELLPVAIPSLIVDLFYLNY--QLTEKDAWRAMKSSLECE--NRRHLRGILAESTVHGCK 409
HEX-5  CELWPTSMVSLALNLIVLTK--FHIDKESAEQVIQALNCP--QTTLDQLVAGS--DRCR 390

HEX-2  YRGFQTYLIIYQSEVPNLFARIDSELSKNHLLMGWANRYNRKYNISQNWYHREMLPFVQQL 532
HEX-3  FPGNRIYEL-INEMYQKQMLRTYRLDDYELNGWLSRVADDYSVSSHWYIDKIENMIEMH 520
HEX-4  FPGADVFEI-----IMHDWKRAVDRRIFGKPDQQSPDSEAIET 448
HEX-5  FPGYRVRDS-IRDYVQLKTFFENSTWVHNRENGWLQSSHMRISANPYIDAIGKAYERT 449

HEX-2  VGQYDDYESDLRASMKDLYFENTIDEFIYEN---LGEMSEKLHGYLEETIQLDKLRAWPK 589
HEX-3  ATPLETVADDLRFEMERIEFKDTVDEFIFTY---LGEDLEWFNRKRETIRKVSTSQTFPK 577
HEX-4  LKNLKKSLNQSILYKTDAEVFNQYLHRVHSLIAQNTRTEITN 491
HEX-5  LKKLDQLSNLSLTSFSEVFYPDVIEEFKTDYFQPFYEDLQKR--KESVDNIDTKRFYVPR 508

HEX-2  RHFPIKK 596
HEX-3  RPFIESAKSEKTCT 591
HEX-5  PWFRR 512

```

**Supplementary Figure 2: Incubation of an asialoagalactoglycopeptide (dabsyl-GnGn) with recombinant *Caenorhabditis* hexosaminidases.** Culture supernatants of yeast transformed with *hex-1*, *hex-2*, *hex-3*, *hex-4* or *hex-5* partial cDNAs were incubated overnight with dabsyl-GnGn (an asialoagalactofibrin glycopeptide) prior to analysis of the incubations by MALDI-TOF MS. A reduction in  $m/z$  from 2062 to 1859 is compatible with the removal of one non-reducing terminal GlcNAc residue from GnGn; laser-induced degradation of the dabsyl moiety results in a loss of  $m/z$  132 (species indicated by an asterisk). In comparison to the HPLC data with GnGn-PA as a substrate (Figure 5), these spectra validate that only HEX-2 and HEX-3 have the obvious ability to remove one GlcNAc residue from the  $\alpha$ 1,3-antenna. Glycan structures are depicted according to the nomenclature of the Consortium for Functional Glycomics

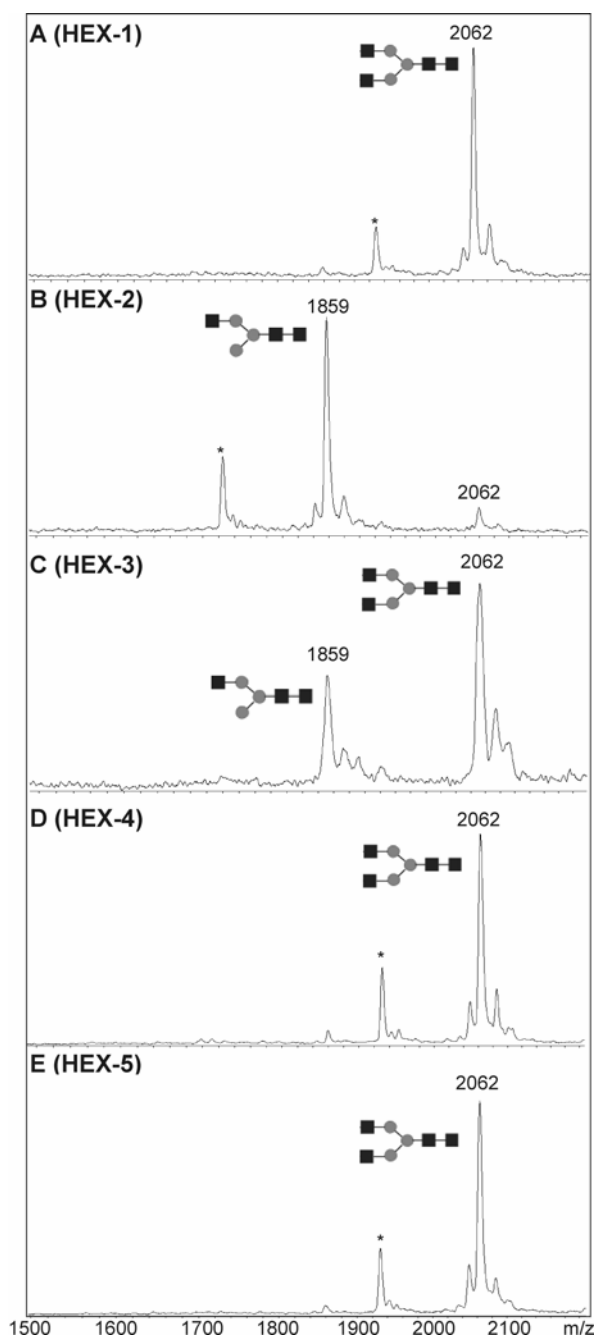

Supplement: NIHMS29324-supplement-1.pdf [file NIHMS29324-supplement-1.pdf]
